# Supplementary material
Source: publisher figshare collection journal article supplement (https://acs.figshare.com/ndownloader/files/13724327)

## Supporting Information

### Exploring heterocycle-spermine conjugates as modulators of oncogenic microRNAs biogenesis

Cécile Becquart,<sup>‡</sup> Myriame Le Roch,<sup>†</sup> Stéphane Azoulay,<sup>‡</sup> Philippe Uriac,<sup>†</sup> Audrey Di Giorgio,<sup>‡</sup> Maria Duca<sup>\*,‡</sup>

<sup>‡</sup> Université Côte d'Azur, CNRS, Institute of Chemistry of Nice (ICN), Nice, France. E-mail: maria.duca@univ-cotedazur.fr

<sup>†</sup> Université de Rennes 1, UMR CNRS (6226), Institut of Chemistry of Rennes (ISCR), Rennes, France.

## **RNA sequences for Dicer-mediated processing inhibition studies and binding affinity evaluation**

### pre-miR-372:

5'-GUGGGCCUCAA AUGUGGAGCACUAUUCUGAUGUCCAAGUGGAAAGUGCUGCGACA UUUGAGCGUCAC-3'

### pre-miR-373:

5'-GGGAUACUCAA AUGGGGGCGCUUCCUUUUUGUCUGUACUGGGAAGUGCUUCGAUUUUGGGGUGUCCC-3'

### pre-miR-17:

5'-GUCAGAAUAAUGUCAAGUGCUUACAGUGCAGGUAGUGAU AUGUGCAUCUACUGCAGUGAAGGCACUUGUAGCAUUAUGGUGAC-3'

### pre-miR-21:

5'-UGUCGGGUAGCUUAUCAGACUGAUGUUGACUGUUGAAUCUCAUGGCAACACCAGUCGAUGGGCUGUCUGACA-3'

### pre-miR-155:

5'-CUGUUA AUGCUAAUCGUGAUAGGGGUUUUUGCCUCCAACUGACUCCUACAUAUUAGCAUUAACAG-3'

**Figure S1.** Inhibition curves of compounds **PA-1** to **PA-5** (concentrations from 15 nM to 31.2  $\mu$ M) in the presence of pre-miR-372 and recombinant Dicer enzyme.

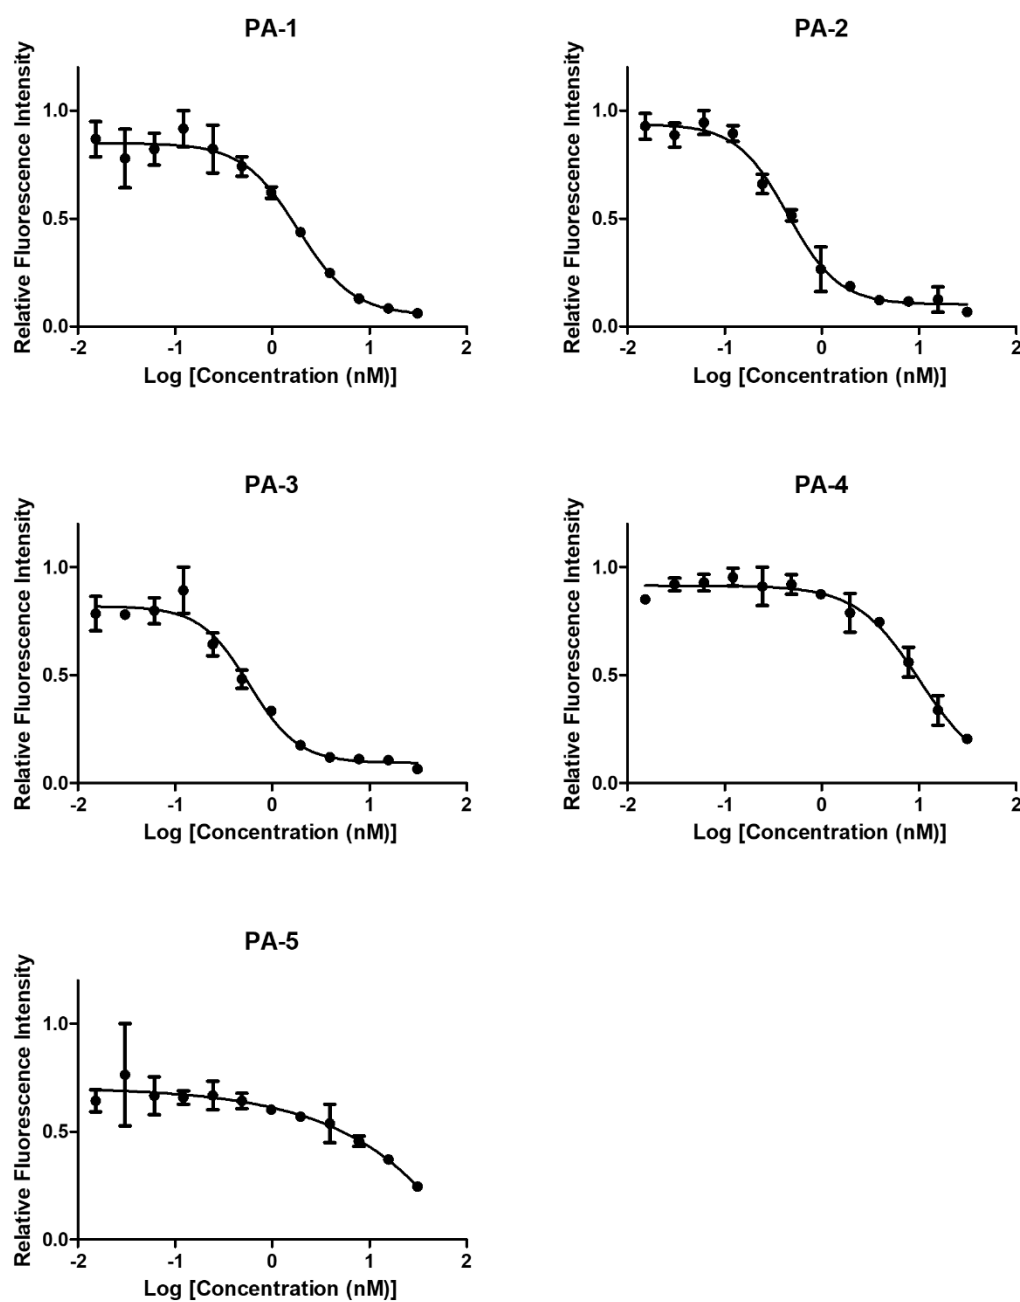

**Figure S2.** Binding curves of compounds **PA-1** to **PA-5** (concentrations from 0.61 nM to 10  $\mu$ M) in the presence of pre-miR-372.

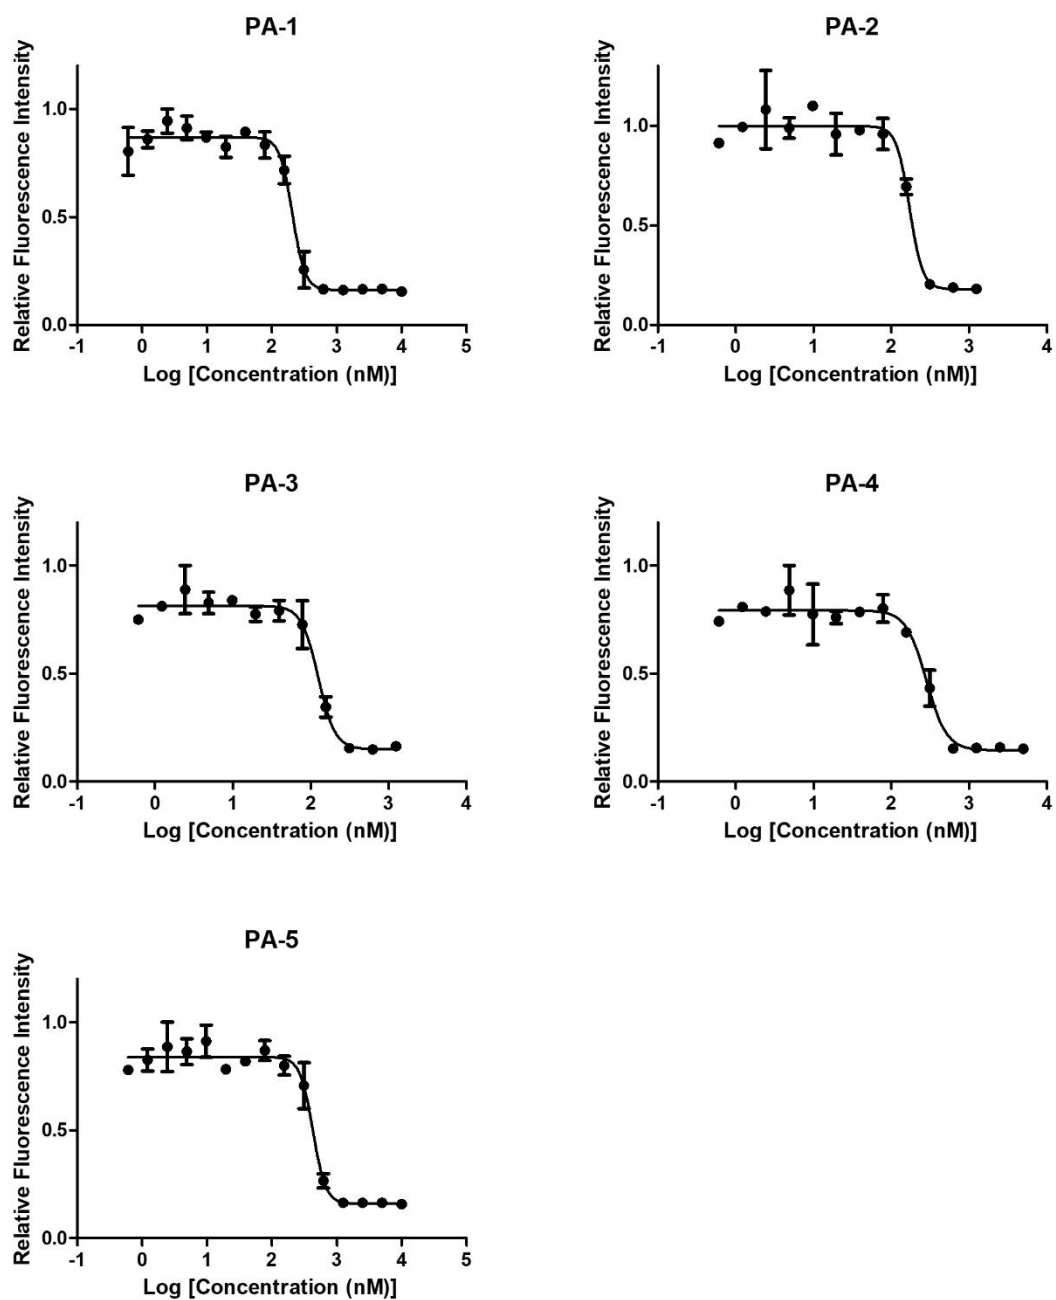

**Figure S3.** Molecular docking of **PA-3** interaction with pre-miR-372 hairpin loop performed using autodock 4 where the grid boxes were fixed on the entire RNA sequence. A) reproduction of Figure 4 without the hydrogen bonding donor-acceptor surfaces and B) different point of view of the interaction in order to better see the entire structure of **PA-3**.

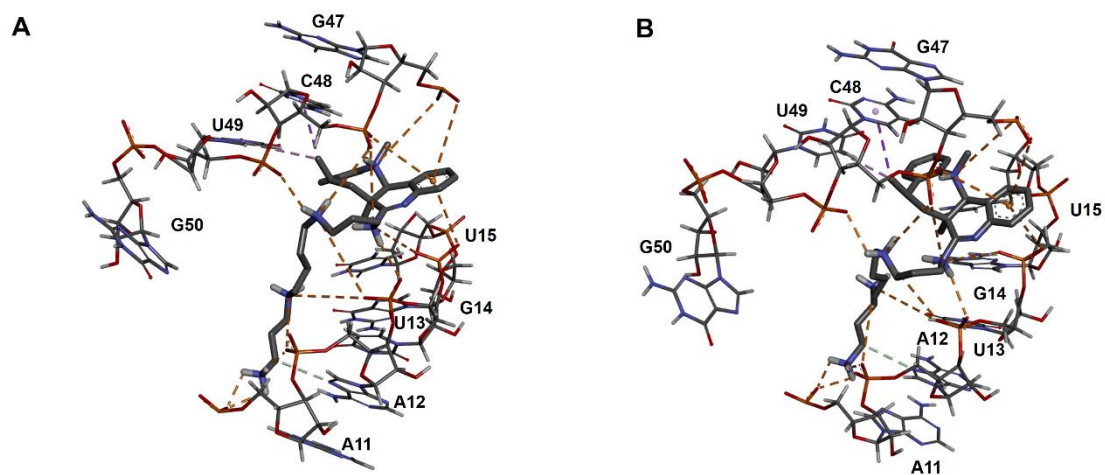

**Figure S4.** Molecular docking of **PA-5** interaction with pre-miR-372 hairpin loop performed using autodock 4 where the grid boxes were fixed on the entire RNA sequence.

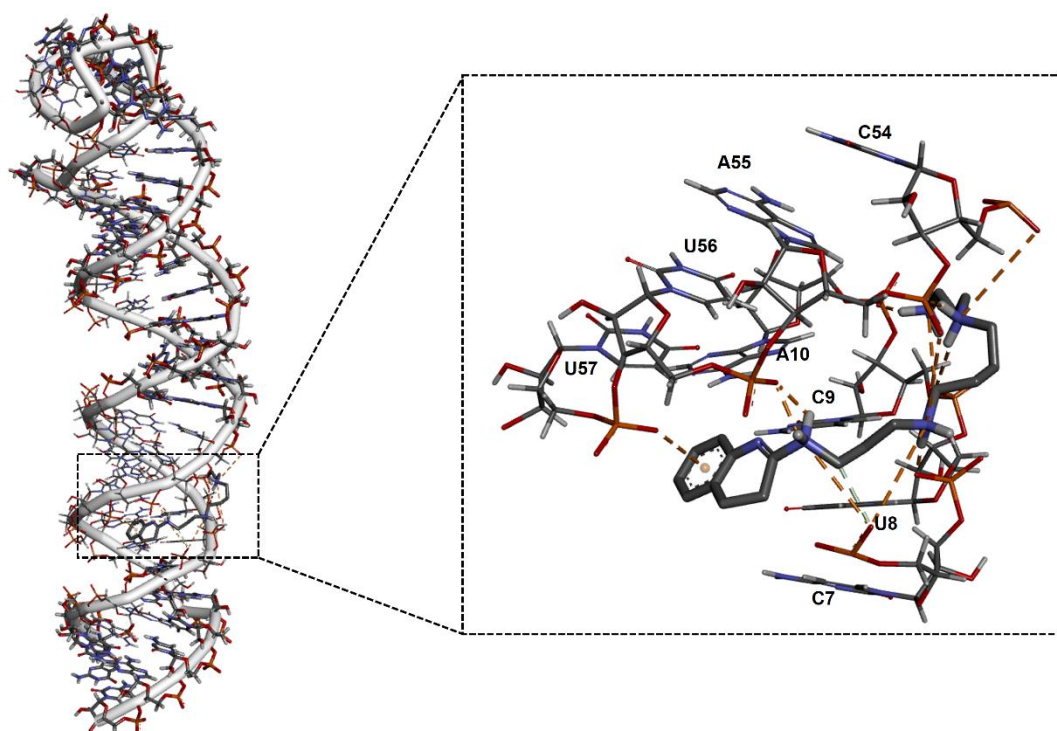

Supplement: Supplementary file 1 [file 13724327]
